1      **Automated High-Throughput Light-Sheet Fluorescence**

2                                      **Microscopy of Larval Zebrafish**

3

4 Savannah L. Logan<sup>†</sup>, Christopher Dudley<sup>†</sup>, Ryan P. Baker<sup>†</sup>, Michael J. Taormina, Edouard A.

5 Hay, Raghuveer Parthasarathy\*

6

7 Materials Science Institute , Institute of Molecular Biology, and Department of Physics, The

8 University of Oregon, Eugene, OR 97403

9

10    <sup>†</sup> Equal contributors

11    \* Corresponding author: raghu@uoregon.edu

12

## 13 **ABSTRACT**

14 Light sheet fluorescence microscopy enables fast, minimally phototoxic, three-dimensional  
15 imaging of live specimens, but is currently limited by low throughput and tedious sample  
16 preparation. Here, we describe an automated high-throughput light sheet fluorescence  
17 microscope in which specimens are positioned by and imaged within a fluidic system  
18 integrated with the sheet excitation and detection optics. We demonstrate the ability of the  
19 instrument to rapidly examine live specimens with minimal manual intervention by imaging  
20 fluorescent neutrophils over a nearly 0.3 mm<sup>3</sup> volume in dozens of larval zebrafish. In  
21 addition to revealing considerable inter-individual variability in neutrophil number, known  
22 previously from labor-intensive methods, three-dimensional imaging allows assessment of  
23 the correlation between the bulk measure of total cellular fluorescence and the spatially  
24 resolved measure of actual neutrophil number per animal. We suggest that our simple  
25 experimental design should considerably expand the scope and impact of light sheet imaging  
26 in the life sciences.

27

## 28 **INTRODUCTION**

29 Light sheet fluorescence microscopy (LSFM) is a powerful tool for examining the three-  
30 dimensional structural and temporal dynamics of living systems. In LSFM, a thin sheet of  
31 laser light excites fluorophores in a sample. Scanning the sample through the sheet enables  
32 fast, three-dimensional imaging with low phototoxicity, high resolution, and a wide field of  
33 view (1–5). Imaging with LSFM has enabled numerous studies of embryonic development  
34 (6,7), neural activity (8), microbial dynamics (9–11), and other phenomena. A large body of  
35 work has focused on improving the optical capabilities of light sheet imaging, for example  
36 using structured illumination (12,13), multiple lens pairs (6), two-photon excitation (14), and

37 other techniques. However, current light sheet fluorescence microscopes have significant  
38 constraints related to throughput and sample handling that, we argue, have placed much  
39 greater limitations on their scientific utility than issues of spatial or temporal resolution. The  
40 majority of existing light sheet fluorescence microscopes, both commercial and non-  
41 commercial, are designed to hold a single specimen. A few instruments (including one from  
42 the authors of this paper) can hold up to six specimens for sequential imaging. Moreover,  
43 light sheet fluorescence microscopy typically requires extensive sample preparation and  
44 manual sample mounting, most commonly by embedding specimens in agarose gels.  
45 Examination of large numbers of specimens is therefore slow and difficult, which is  
46 especially important given the high level of inter-individual variability found in many  
47 complex biological processes. Increasing the pace of insights into developmental biology,  
48 multicellular biophysics, or microbial community structure will require faster and simpler  
49 acquisition of three-dimensional imaging datasets. To date, there exists only one report of an  
50 automated light sheet microscope that makes use of fluidic positioning of live animals (15);  
51 its throughput (specimens per hour) is not stated, and though its ability to image larval  
52 zebrafish is clear, the total number of animals examined was only twelve. In contrast,  
53 automated, high-throughput methods have been integrated with other types of microscopes,  
54 including confocal microscopes (16–18). Our system adopts and builds upon these,  
55 especially the confocal-based setup of Ref. 16.

56

57 To address the issues described above, we developed a light sheet fluorescence microscope  
58 capable of automated, high-throughput imaging of live specimens. Our instrument uses  
59 fluidic control and image-based registration to rapidly but precisely position specimens for  
60 light sheet scans and subsequently remove them from the imaging area. We characterize the

61 optical quality of our instrument, and demonstrate its capabilities by rapidly imaging immune  
62 cells in dozens of larval zebrafish. While the spatial resolution of our microscope does not  
63 equal that of current “low-throughput” light sheet microscopes, it is more than sufficient for  
64 determining cellular distributions. Moreover, we argue that the tradeoff of lower resolution  
65 for higher throughput is worthwhile given the large variance in most biological datasets. We  
66 find, for example, a high degree of variation between fish in total neutrophil number, and  
67 clustering of neutrophils in two distinct regions near the swim bladder. While our instrument  
68 is optimized for imaging of larval zebrafish, the design could easily be modified for rapid  
69 imaging of a wide range of biological and non-biological samples, which should broaden the  
70 impact of light sheet microscopy in a variety of fields.

71

## 72 **RESULTS**

### 73 **Instrument design**

74 The light sheet portion of the microscope closely follows the design of Keller et al (1); a  
75 rapidly-scanned galvanometer creates a sheet of light for fluorescence excitation, and emitted  
76 light is captured by a camera perpendicular to the plane of the sheet (Fig. 1A). In  
77 conventional light sheet fluorescence microscopes, gel-mounted specimens are introduced  
78 vertically in between horizontal lenses. To achieve high throughput, we use a continuous  
79 fluidic path through plastic tubing and glass capillaries for transport as well as imaging,  
80 detailed below. If the fluidic path were oriented vertically, specimens would gravitationally  
81 drift during imaging. Therefore, we adopted a geometry in which specimens are transported  
82 horizontally and the sheet plane is vertical (Fig. 1A,B). To allow this arrangement, we  
83 designed an elongated sample chamber with windows oriented below and perpendicular to  
84 the sample (Fig. 1B,C). Before entering the imaging chamber, specimens flow through a

85 system of 0.7 mm diameter plastic tubing at a typical flow rate of 1 ml/min, or 4 cm/sec  
86 (Fig. 1). Flow speed and direction are controlled by a syringe pump (Fig. 1); see  
87 Supplemental Methods for a parts list and descriptions.

88

89 **Figure 1. Instrument design.** (A) Schematic of the instrument design, with  
90 labels corresponding to the parts list in Table 1. See also Supplementary  
91 Movie 1. The excitation laser line is selected by an acousto-optic tunable  
92 filter (AOTF<sub>2</sub>), then directed to a galvanometer mirror (G<sub>3</sub>) and objective  
93 lens (L<sub>4</sub>) to create a time-averaged sheet of light in the sample chamber (C)  
94 via a prism (Pr<sub>5</sub>). Specimens flow through a system of tubing controlled by a  
95 syringe pump (Pu<sub>9</sub>) and valves (V<sub>10</sub>) and are automatically positioned in a  
96 square-walled capillary (Cap<sub>11</sub>) for imaging. Bright field images are used for  
97 positioning the sample and are illuminated with an LED (LED<sub>6</sub>). After  
98 imaging, specimens are directed into a reservoir (R). (B) Schematic of the  
99 imaging area. The 3D-printed sample chamber (C), prism (Pr<sub>5</sub>), and imaging  
100 capillary (Cap<sub>11</sub>) are apparent. (C) Photograph of the imaging area  
101 corresponding to the schematic in (B).

102

103 Inside the imaging chamber, specimens flow into a square-walled glass capillary in front of  
104 the imaging objective where they are automatically detected by bright field microscopy.  
105 Specimens are rapidly stopped using computer-controlled valves on either side of the  
106 imaging chamber, with a precision of approximately 1 mm in position, comparable to the  
107 length of a larval zebrafish. Fine positioning is performed by iterated movement of the  
108 capillary by a computer-controlled stage, brightfield imaging, and cross-correlation of images

109 with a previously assembled image library (Fig. 2 A,B). The travel range of the capillary on  
110 the stage allows movement of up to 30 mm in the x-direction. Like many studies, ours make  
111 use of larval zebrafish as a model organism; strong features such as eyes and the swim  
112 bladder enable straightforward correlation-based registration, with an estimated precision of  
113 about 20  $\mu\text{m}$ . This approach should be applicable to any specimen with a roughly  
114 stereotypical anatomy.

115

116 Once positioned, specimens are automatically imaged using LSFM. The imaging chamber  
117 has sufficient depth, 35 mm, that the capillary can be scanned through the sheet by a  
118 motorized stage. In our setup, repeated scans with up to three excitation wavelengths are  
119 possible; this is limited simply by the number of available laser lines. The precision of the  
120 automated positioning enables scans to be taken of particular regions, for example the larval  
121 gut, as shown below. After imaging, specimens flow into a collection reservoir and  
122 subsequent specimens are automatically positioned for imaging. We provide a movie of the  
123 instrument in operation as Supplementary Video S1. A complete parts list is provided as  
124 Table 1, in Supplemental Methods.

125

## 126 **Optical quality**

127 Our instrument uses glass capillaries for specimen mounting, rather than more conventional  
128 gel embedding. The square cross-section of these capillaries should lead to less distortion  
129 than more common cylindrical capillaries. To assess the optical quality of our setup, we  
130 measured the point spread function (PSF) by imaging 28 nm diameter fluorescent  
131 microspheres dispersed in oil in these capillaries (see Methods for details). The diffraction-  
132 limited width of the particles in the sheet plane ( $xy$ ), assessed as the standard deviation of a

133 Gaussian function fit to the particle's intensity profile, is  $0.6 \mu\text{m}$ , and the width along the  
134 detection axis ( $z$ ) is  $3.4 \pm 0.6 \mu\text{m}$ , consistent with the expected sheet thickness of our setup  
135 (Fig. 2 C,D).

136

137 **Figure 2. Specimen positioning and image quality.** (A) Composite  
138 brightfield image of a larval zebrafish positioned in a glass capillary. Scale bar:  
139  $50 \mu\text{m}$ . (B) Normalized intensity averaged along the short axis of the  
140 brightfield image, and the intensity of the template image that best matches  
141 the fish in (A). Cross-correlation with the template is used to automatically  
142 position the fish for light sheet fluorescence imaging. (C) Light sheet  
143 fluorescence images of a  $28 \text{ nm}$  diameter fluorescent microsphere, showing  
144  $x$ - $y$  and  $z$ - $y$  planes centered on the particle. (D) Line-scan of intensity along  
145 the detection axis ( $z$ ) through a fluorescent microsphere, with a Gaussian fit  
146 showing a width of approximately  $3 \mu\text{m}$ .

147

#### 148 **Data collection capabilities**

149 Using this system, we can image approximately 30 larval zebrafish per hour, obtaining from  
150 each a  $666 \times 431 \times 1060 \mu\text{m}$  ( $x, y, z$ ) three-dimensional scan, a marked improvement over  
151 manual mounting and imaging that, even by a skilled researcher, is limited to about 5 fish per  
152 hour. The triggering accuracy is about 90%, with roughly 10% of detected objects being  
153 bubbles or debris that are easily identified after imaging. On average, 81% of larval fish are  
154 automatically positioned correctly in front of the imaging objective. The remaining 19%  
155 correspond to multiple fish being in the field of view, or other positioning errors.  
156 Importantly, the majority of the run time of the instrument is spent obtaining light sheet

157 fluorescence images, and is not dominated by specimen positioning. In the batch of  $N=41$   
158 fish whose neutrophil distributions were imaged in experiments described below, for  
159 example, the flow, detection, and positioning of the specimens occupied only approximately  
160 30 seconds per fish. In the limit of zero imaging time (e.g. for very bright signals or small  
161 regions of interest), the system could therefore record data from up to about 120 specimens  
162 per hour in the absence of triggering or positioning errors, or about 90 specimens per hour  
163 with the present system performance.

164

### 165 **Neutrophil distributions in larval zebrafish**

166 To demonstrate the capabilities of the instrument, we imaged fluorescent neutrophils in  
167 larval zebrafish at 5 days post-fertilization (dpf), focusing especially on the number of these  
168 immune cells and their distribution near the anterior of the intestine. Specifically, these were  
169 fish engineered to express green fluorescent protein (GFP) under the promoter  
170 myeloperoxidase, an enzyme primarily produced in neutrophils (19). In total, we imaged 41  
171 fish, obtaining from each a single  $666 \times 431 \times 1060 \mu\text{m}$  three-dimensional image in which  
172 neutrophils were readily evident (Fig. 3A and Supplementary Movie S2). The strong GFP  
173 signal enabled automated identification of neutrophils by standard segmentation methods.  
174 Corroborating previous work done by manual dissection of zebrafish (20), we found a high  
175 degree of variation in neutrophil number between specimens, with the standard deviation  
176 being 30% of the mean (Fig. 3B). Furthermore, we found that neutrophils tend to cluster in  
177 two distinct regions: adjacent to the swim bladder on both the anterior and posterior (Fig.  
178 3C). Notably, the total GFP intensity in a fish is weakly correlated with the number of  
179 neutrophils, with a coefficient of determination  $R^2 = 0.4$ , indicating that a simple measure of



180 overall brightness, as could be assessed without three-dimensional microscopy, would  
181 provide a poor diagnostic of the actual abundance of immune cells (Fig. 3D).

182

183 **Figure 3. Imaging neutrophils in larval zebrafish.** (A) A maximum  
184 intensity projection of a three-dimensional light sheet fluorescence image of  
185 GFP-expressing neutrophils near the intestine of a 5 dpf larval zebrafish. The  
186 3D scan is provided as Supplemental Movie 2. The intestine and swim  
187 bladder are roughly outlined by the yellow dotted lines. Scale bar: 100  $\mu\text{m}$ .  
188 (B) The total number of neutrophils in each fish; the x-axis is ordered by  
189 neutrophil count. (C) Neutrophil count along the anterior-posterior  
190 dimension, summed over all fish examined ( $N=41$ ). The x-axis corresponds  
191 approximately to the horizontal range of (A). (D) The total intensity of the  
192 detected neutrohils per fish vs the total number of neutrophils in that fish.  
193 The two measures are weakly correlated with a coefficient of determination  
194  $R^2 = 0.4$ .

195

## 196 **DISCUSSION**

197 While our microscope is optimized for rapid imaging of larval zebrafish, the design is general  
198 and opens numerous possibilities for imaging a wide range of specimens, such as organoids,  
199 drosophila embryos, small marine invertebrates, and more, with the appropriate expansion  
200 of the positioning image library. While the present design provides only a single three-  
201 dimensional image of each specimen, we envision future integration of a closed-loop fluidic  
202 circuit, with which specimens can be automatically loaded, imaged, and circulated repeatedly,  
203 allowing for high-throughput acquisition of multiple snapshots of the same specimen over

204 time. In general, tackling the challenge of automated, high-throughput specimen handling  
205 will allow the technique of light sheet fluorescence microscopy to maximize its impact on  
206 the life sciences.

207

## 208 **METHODS**

### 209 **Hardware**

210 The majority of the instrument was constructed with off the shelf parts. Custom parts were  
211 either laser cut from acrylic sheets or were 3D printed (see Parts List).

212

213 Fluorescence excitation is provided by various solid state lasers, selected by an acousto-optic  
214 tunable filter (AOTF, AA Opto-electronic) for coupling into a fiber launch to a  
215 galvanometer mirror (Cambridge Technology), which oscillates with a triangular waveform  
216 at 1 kHz to sweep the beam into a sheet. An objective lens (Mitutoyo 5X) and a prism route  
217 the sheet to the water-filled sample chamber where it intersects the specimen (Fig. 1).  
218 Detection is provided by a 20x water immersion objective (Olympus 20XW), mounted in the  
219 side of the chamber and sealed with an o-ring, its corresponding tube lens, and an sCMOS  
220 camera (Hamamatsu Orca Flash 4.0). Exposure times were 25 ms for all experiments  
221 presented here. Instrument control software was written in MATLAB.

222

### 223 **Imaging Procedure**

224 For live imaging, each larval zebrafish flows through 0.7 mm inner diameter silicone tubing  
225 to a 50 mm long section of round 0.7 mm inner diameter, square exterior cross section, glass  
226 tubing in the specimen chamber. The contrast between the specimen and background in  
227 brightfield images is used to detect the specimen, stop the pump, and close off tubing using

228 pinch valves to prevent specimen drift. The  $xyz$  stage arm holding the glass capillary is  
229 scanned along the capillary's length to locate the section to be imaged, as described in the  
230 main text. Following positioning, bright field illumination is switched off and the desired  
231 laser wavelength is selected by the AOTF. The  $xyz$  arm is then scanned perpendicular to the  
232 sheet plane, generating a 3D image stack. The scan can be repeated for another region or  
233 another wavelength before the pump is directed to send the specimen out of the chamber,  
234 and bring in the next specimen.

235

### 236 **Point Spread Function**

237 For measurements of the point spread function, 28 nm diameter fluorescent carboxylate-  
238 modified polystyrene spheres (Thermo Fisher cat. #F8787), with peak excitation and  
239 emission wavelengths 505 and 515 nm, respectively, were dispersed in oil with a similar  
240 index of refraction as water (Zeiss Immersol W 2010) inside the imaging capillaries. Three-  
241 dimensional scans were taken, with a z-spacing of 0.5  $\mu\text{m}$ .

242

### 243 **Ethics statement**

244 All zebrafish experiments were carried out in accordance with protocols approved by the  
245 University of Oregon Institutional Animal Care and Use Committee (21).

246

### 247 **Zebrafish husbandry**

248 The zebrafish line *Tg[BACmpo:gfp]* (19) was used for neutrophil imaging. Larval zebrafish  
249 were raised at a density of one embryo per milliliter and kept at a constant temperature of 28  
250 °C. Embryos were not fed during experiments and were sustained by their yolks.

251

## 252 **Sample preparation**

253 Larval zebrafish were placed in dishes containing sterile embryo media with 0.05%  
254 methylcellulose and anaesthetized using 240 µg/ml tricaine methanesulfonate. This  
255 anaesthetic concentration is higher than the standard dosage, but was necessary likely  
256 because of permeation through the plastic tubing. In preparation for imaging, larval  
257 zebrafish were drawn into a system of tubing with a spacing of approximately 6 inches.  
258 During experiments, larvae flowed through the tubing and were automatically stopped and  
259 positioned by a syringe pump and a series of valves. After imaging, larvae flowed into a dish  
260 containing sterile embryo medium.

261

## 262 **Image-based neutrophil quantification**

263 Neutrophil segmentation was performed using an iterative approach. First, an intensity  
264 threshold was applied to the image stack creating a binary mask, after which connected  
265 objects were detected and objects over a minimum size were kept. Then, each object larger  
266 than a specified size was re-thresholded using Otsu thresholding followed by erosion.  
267 Connected objects were then detected and this process was repeated until all objects were  
268 either removed or retained.

269

## 270 **ACKNOWLEDGEMENTS**

271 We thank Rose Sockol, Kyleah Murphy, and the University of Oregon Zebrafish Facility  
272 staff for fish husbandry, and Karen Guillemin and Brandon Schlomann for useful comments  
273 and conversations. Research reported in this publication was supported in part by the  
274 National Science Foundation (NSF) under award 1427957 (to RP), by the the M. J. Murdock  
275 Charitable Trust, and by the National Institutes of Health (NIH) as follows: by the National

276 Institute of General Medical Sciences under award number P50GM098911 and by the  
277 National Institute of Child Health and Human Development under award P01HD22486,  
278 which provided support for the University of Oregon Zebrafish Facility. The content is  
279 solely the responsibility of the authors and does not represent the official views of the NIH,  
280 NSF, or other funding agencies.

281

## 282 REFERENCES:

- 283 1. Keller PJ, Schmidt AD, Wittbrodt J, Stelzer EHK. Reconstruction of Zebrafish Early  
284 Embryonic Development by Scanned Light Sheet Microscopy. *Science*.  
285 2008;322(5904):1065–9. Available from:  
286 <http://www.sciencemag.org/cgi/content/abstract/322/5904/1065>
- 287 2. Power RM, Huisken J. A guide to light-sheet fluorescence microscopy for multiscale  
288 imaging. *Nat Methods*. 2017 Apr;14(4):360–73. Available from:  
289 <http://www.nature.com/nmeth/journal/v14/n4/full/nmeth.4224.html>
- 290 3. Keller PJ, Ahrens MB, Freeman J. Light-sheet imaging for systems neuroscience. *Nat*  
291 *Methods*. 2015 Jan;12(1):27–9. Available from:  
292 <http://www.nature.com/nmeth/journal/v12/n1/full/nmeth.3214.html>
- 293 4. Huisken J. Slicing embryos gently with laser light sheets. *BioEssays*. 2012  
294 May;34(5):406–11. Available from:  
295 <https://onlinelibrary.wiley.com/doi/abs/10.1002/bies.201100120>
- 296 5. Santi PA. Light Sheet Fluorescence Microscopy. *J Histochem Cytochem*. 2011 Feb  
297 1;59(2):129–38. Available from: <http://jhc.sagepub.com/content/59/2/129.abstract>
- 298 6. Tomer R, Khairy K, Amat F, Keller PJ. Quantitative high-speed imaging of entire  
299 developing embryos with simultaneous multiview light-sheet microscopy. *Nat*  
300 *Methods*. 2012;9:755–63. Available from:  
301 <http://www.nature.com/nmeth/journal/vaop/ncurrent/full/nmeth.2062.html>
- 302 7. Weber M, Scherf N, Meyer AM, Panáková D, Kohl P, Huisken J. Cell-accurate optical  
303 mapping across the entire developing heart. *eLife*. 2017 Dec 29;6:e28307. Available  
304 from: <https://elifesciences.org/articles/28307>
- 305 8. Keller PJ, Ahrens MB. Visualizing Whole-Brain Activity and Development at the Single-  
306 Cell Level Using Light-Sheet Microscopy. *Neuron*. 2015 Feb 4;85(3):462–83. Available  
307 from: [https://www.cell.com/neuron/abstract/S0896-6273\(14\)01148-9](https://www.cell.com/neuron/abstract/S0896-6273(14)01148-9)
- 308 9. Wiles TJ, Jemielita M, Baker RP, Schlomann BH, Logan SL, Ganz J, et al. Host Gut  
309 Motility Promotes Competitive Exclusion within a Model Intestinal Microbiota. *PLOS*  
310 *Biol*. 2016 Jul 26;14(7):e1002517. Available from:  
311 <http://journals.plos.org/plosbiology/article?id=10.1371/journal.pbio.1002517>
- 312 10. Logan SL, Thomas J, Yan J, Baker RP, Shields DS, Xavier JB, et al. The *Vibrio cholerae*  
313 type VI secretion system can modulate host intestinal mechanics to displace gut  
314 bacterial symbionts. *Proc Natl Acad Sci*. 2018 Apr 17;115(16):E3779–87. Available  
315 from: <https://doi.org/10.1073/pnas.1720133115>
- 316 11. Parthasarathy R. Monitoring microbial communities using light sheet fluorescence  
317 microscopy. *Curr Opin Microbiol*. 2018 Jun;43:31–7. Available from:  
318 <https://www.sciencedirect.com/science/article/pii/S1369527417301376>

- 319 12. Chen B-C, Legant WR, Wang K, Shao L, Milkie DE, Davidson MW, et al. Lattice light-  
320 sheet microscopy: Imaging molecules to embryos at high spatiotemporal resolution.  
321 Science. 2014 Oct 24;346(6208):1257998. Available from:  
322 <http://www.sciencemag.org/content/346/6208/1257998>
- 323 13. Chang B-J, Meza VDP, Stelzer EHK. csiLSFM combines light-sheet fluorescence  
324 microscopy and coherent structured illumination for a lateral resolution below 100 nm.  
325 Proc Natl Acad Sci. 2017 May 9;114(19):4869–74. Available from:  
326 <http://www.pnas.org/content/114/19/4869>
- 327 14. Truong TV, Supatto W, Koos DS, Choi JM, Fraser SE. Deep and fast live imaging with  
328 two-photon scanned light-sheet microscopy. Nat Meth. 2011;8(9):757–60. Available  
329 from: <http://dx.doi.org/10.1038/nmeth.1652>
- 330 15. Gualda EJ, Pereira H, Vale T, Estrada MF, Brito C, Moreno N. SPIM-fluid: open source  
331 light-sheet based platform for high-throughput imaging. Biomed Opt Express. 2015  
332 Nov 1;6(11):4447. Available from:  
333 <https://www.osapublishing.org/abstract.cfm?URI=boe-6-11-4447>
- 334 16. Pardo-Martin C, Chang T-Y, Koo BK, Gilleland CL, Wasserman SC, Yanik MF. High-  
335 throughput in vivo vertebrate screening. Nat Methods. 2010 Aug;7(8):634–6. Available  
336 from: <http://www.ncbi.nlm.nih.gov/pubmed/20639868>
- 337 17. Yanik MF, Rohde CB, Pardo-Martin C. Technologies for Micromanipulating, Imaging,  
338 and Phenotyping Small Invertebrates and Vertebrates. Annu Rev Biomed Eng. 2011  
339 Aug;13(1):185–217. Available from:  
340 <http://www.annualreviews.org/doi/abs/10.1146/annurev-bioeng-071910-124703>
- 341 18. Hwang H, Lu H. Microfluidic tools for developmental studies of small model  
342 organisms--nematodes, fruit flies, and zebrafish. Biotechnol J. 2013 Feb;8(2):192–205.  
343 Available from: <https://onlinelibrary.wiley.com/doi/pdf/10.1002/biot.201200129>
- 344 19. Renshaw SA, Loynes CA, Trushell DM, Elworthy S, Ingham PW, Whyte MK. A  
345 transgenic zebrafish model of neutrophilic inflammation. Blood. 2006 Dec  
346 15;108(13):3976–8. Available from: <https://doi.org/10.1182/blood-2006-05-024075>
- 347 20. Rolig AS, Parthasarathy R, Burns AR, Bohannan BJM, Guillemin K. Individual  
348 Members of the Microbiota Disproportionately Modulate Host Innate Immune  
349 Responses. Cell Host Microbe. 2015 Nov 11;18(5):613–20. Available from:  
350 <http://www.sciencedirect.com/science/article/pii/S1931312815004199>
- 351 21. Westerfield M. The zebrafish book. A guide for the laboratory use of zebrafish (*Danio*  
352 *rerio*). Vol. 5th. Eugene, OR: University of Oregon Press; 2007. Available from:  
353 [http://zfin.org/zf\\_info/zfbook/zfbk.html](http://zfin.org/zf_info/zfbook/zfbk.html)

354

355

356

357 **SUPPORTING INFORMATION CAPTIONS:**

358

359 **Supplemental Movie 1.** Video of the automated, high-throughput light sheet microscope in  
360 operation. After a larval zebrafish, flowing through tubing, is detected and positioned, 3D  
361 scans in two colors in two different regions, are obtained. The final image (0:57-1:03) is of  
362 tdTomato-labeled bacteria and GFP-labeled neutrophils.

363

364 **Supplemental Movie 2.** A light sheet fluorescence scan through the anterior intestine of a  
365 larval zebrafish with GFP-expressing neutrophils evident as very bright objects above  
366 autofluorescent background. The total image depth is 475  $\mu\text{m}$  (2.5  $\mu\text{m}$ /slice x 190 slices).  
367 The maximum intensity projection of this scan is shown in Figure 2E.

368



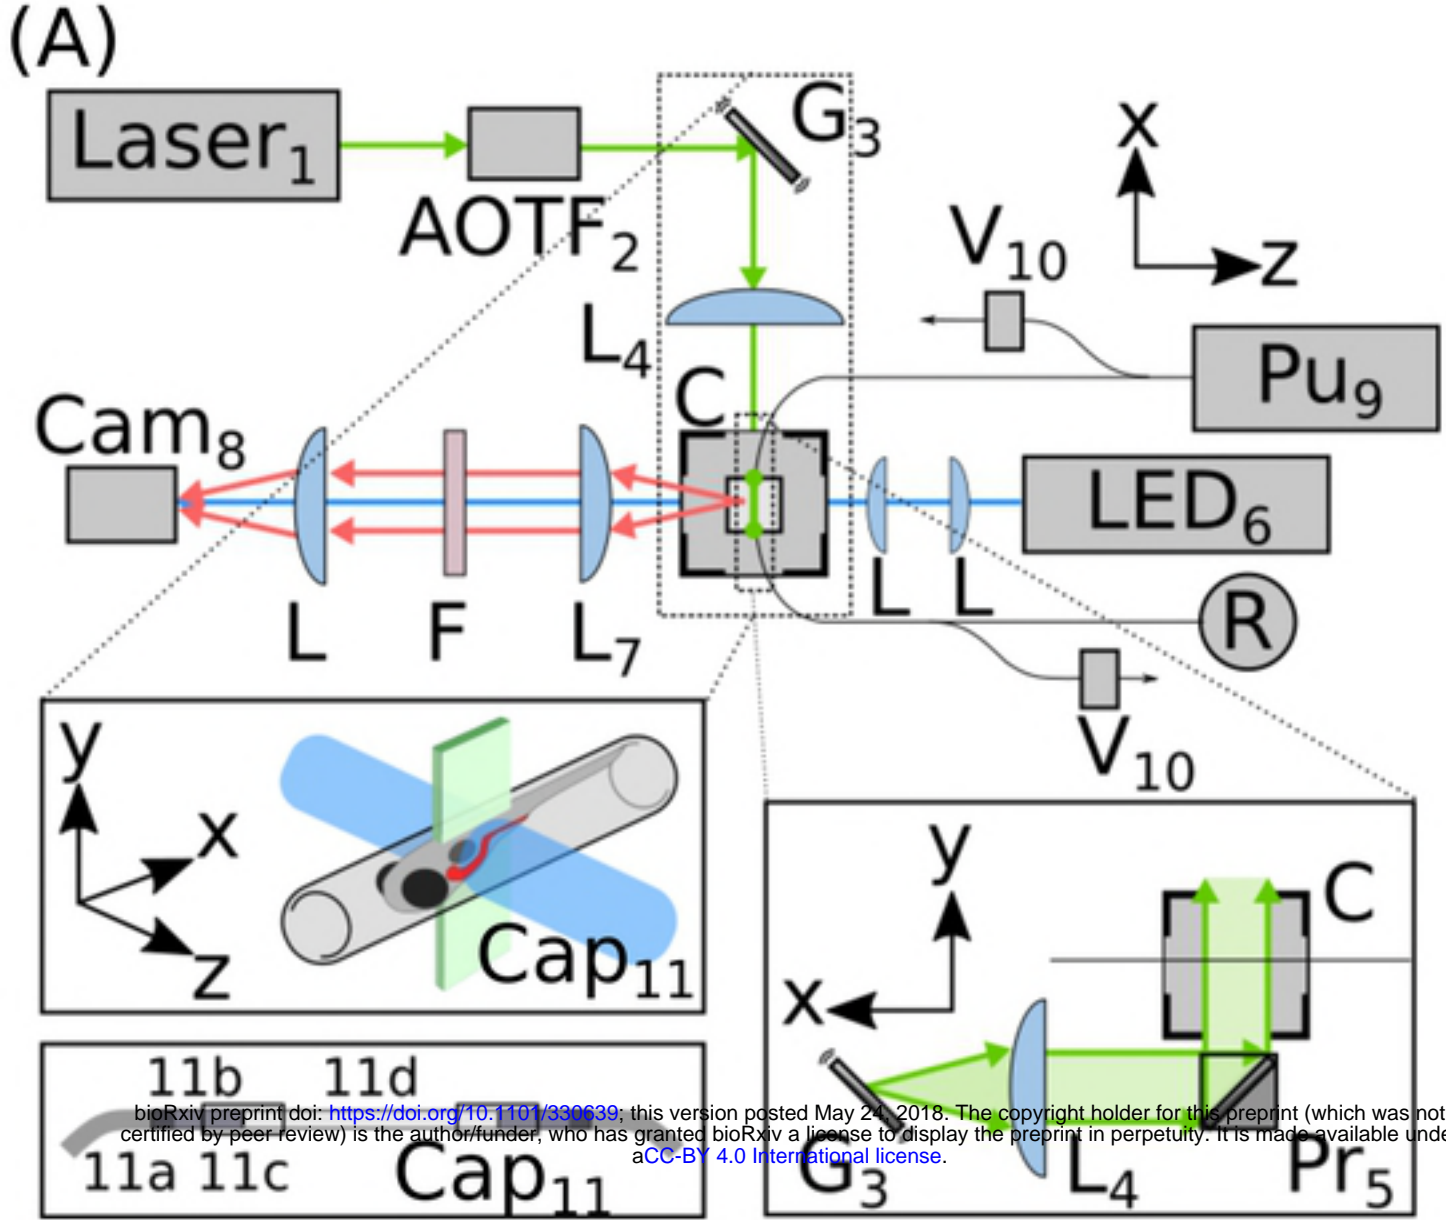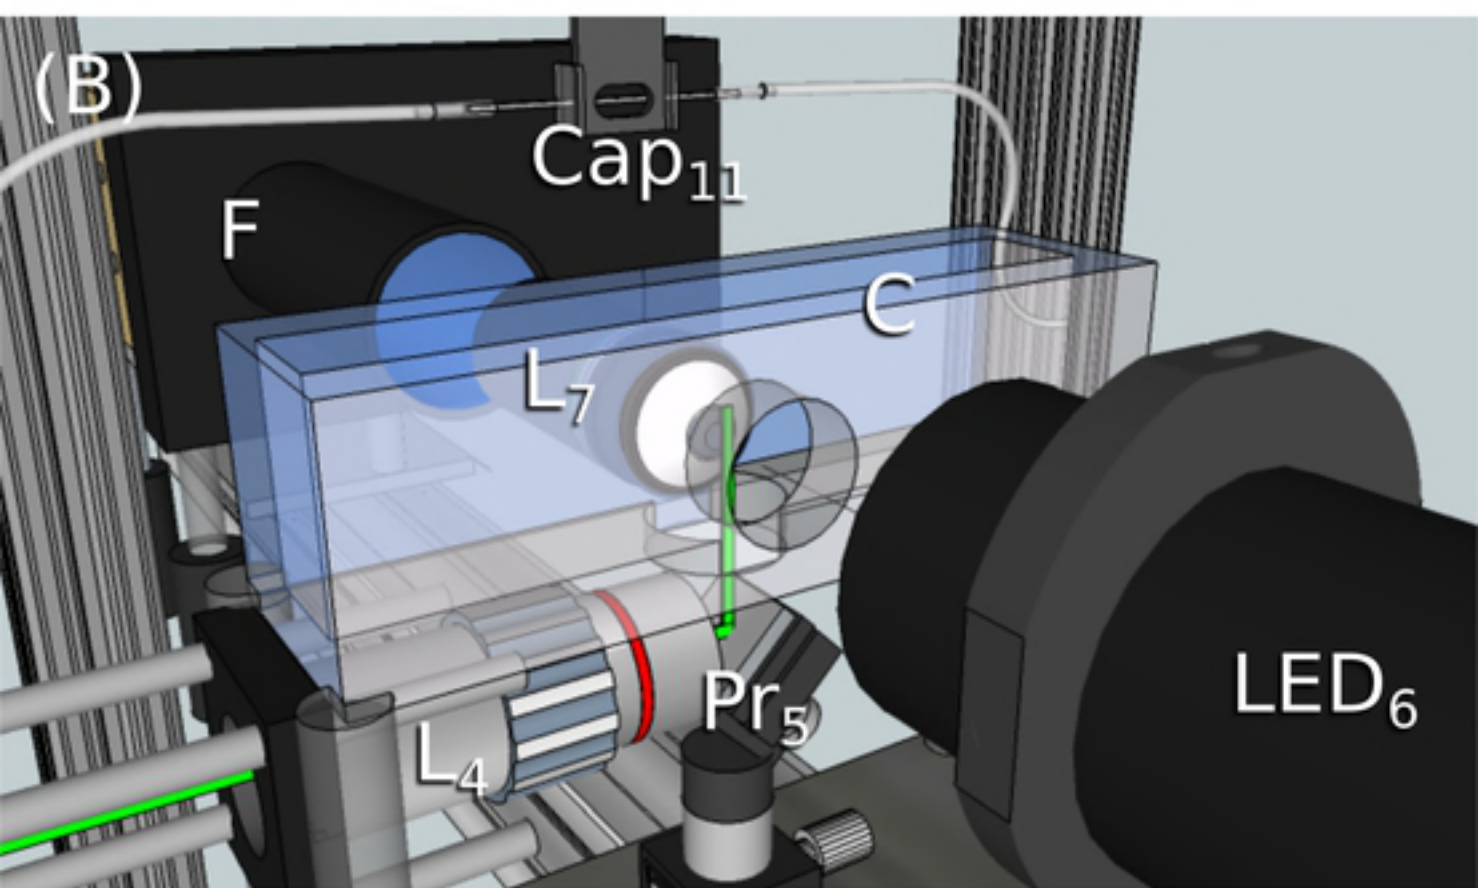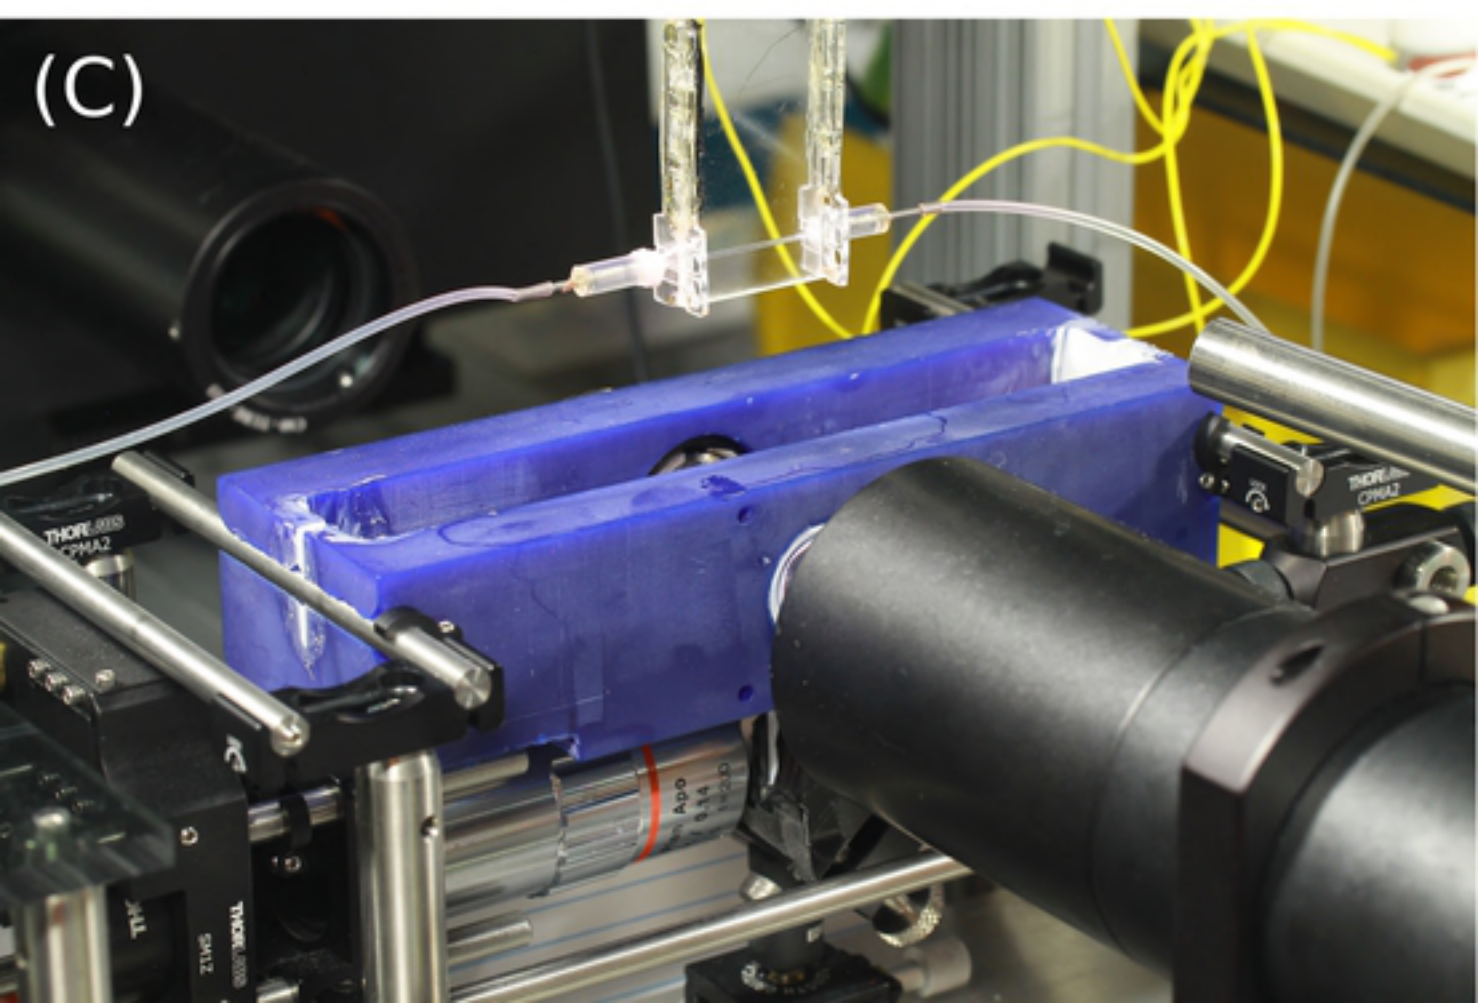

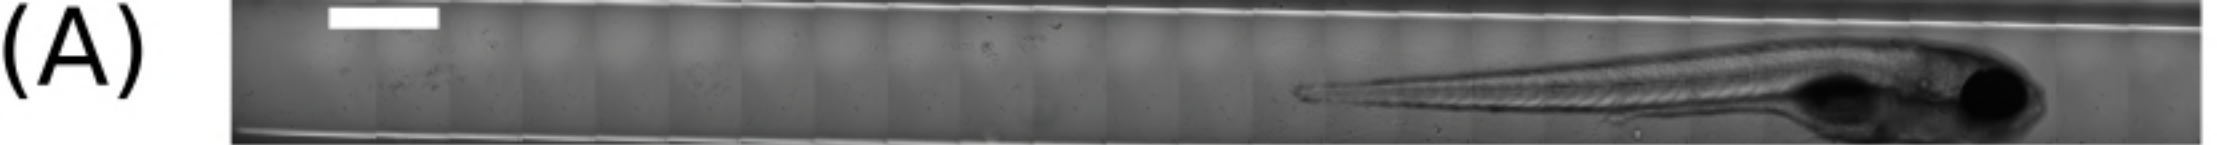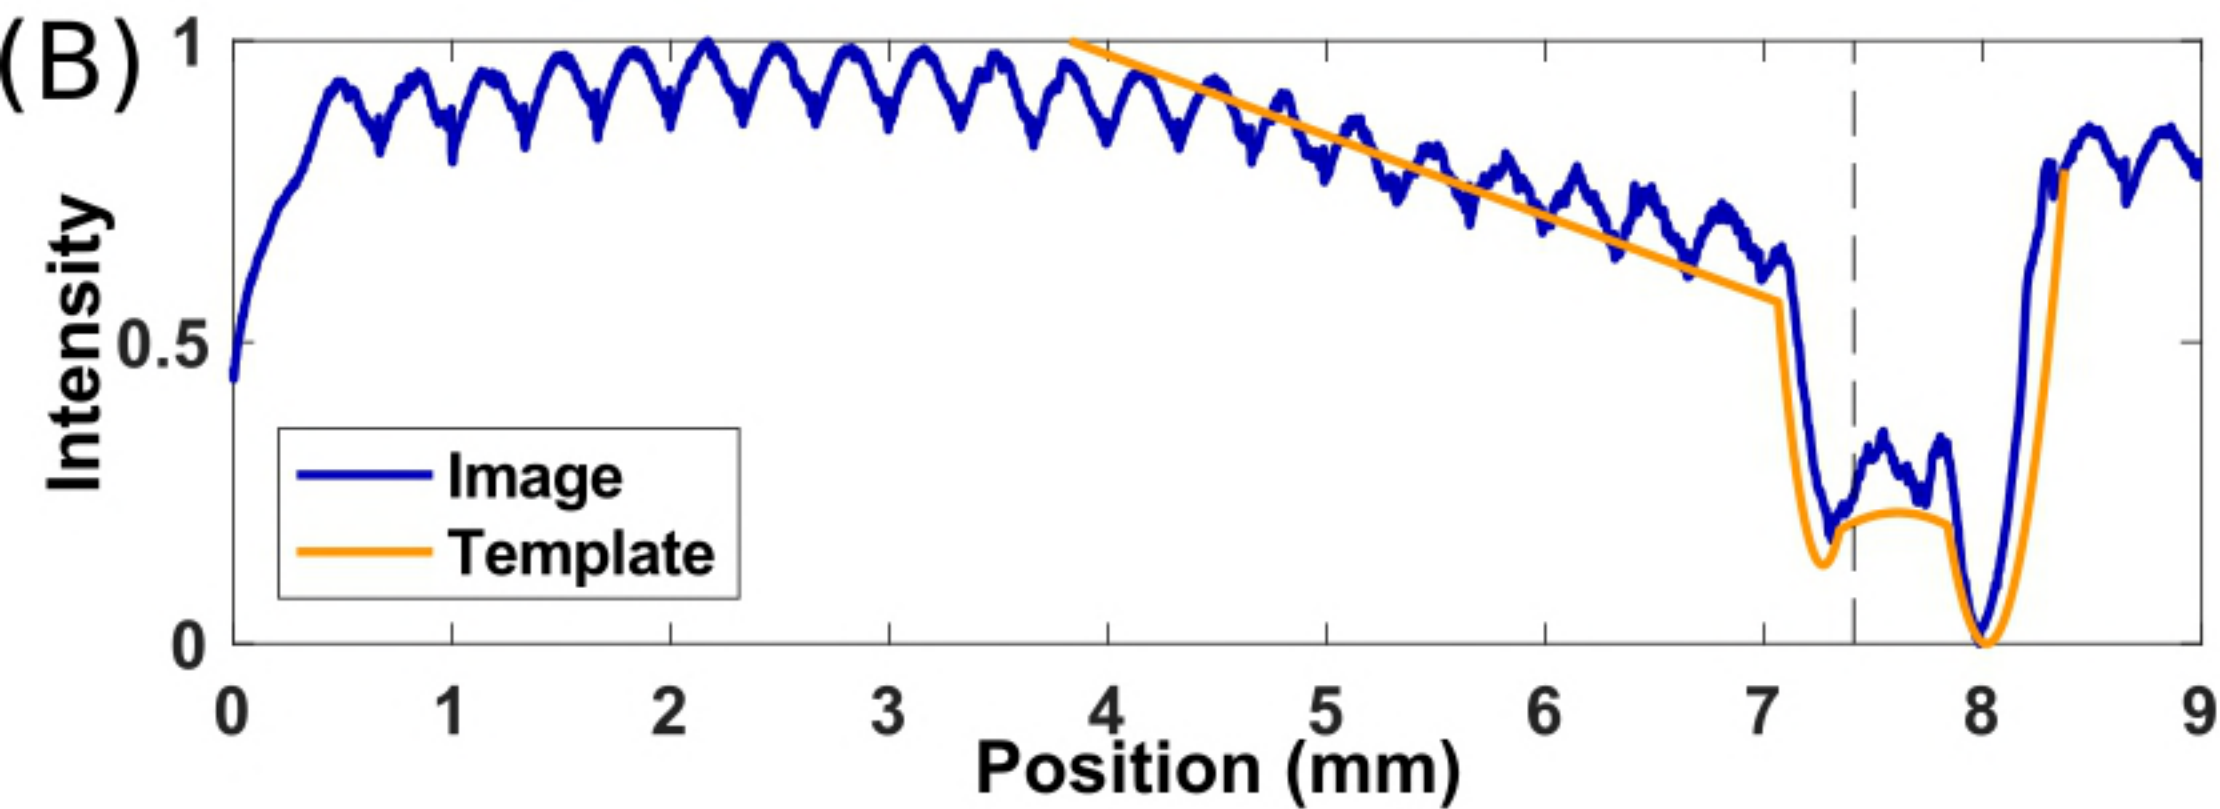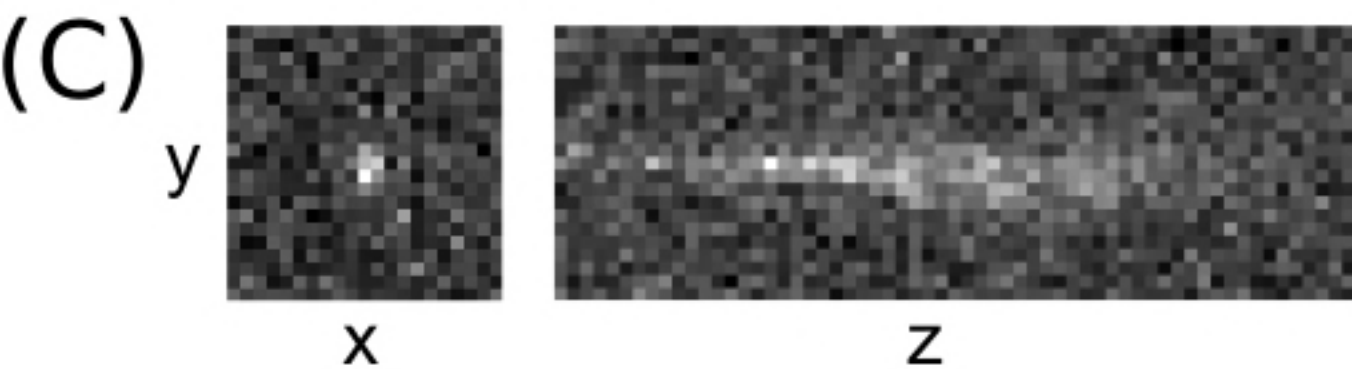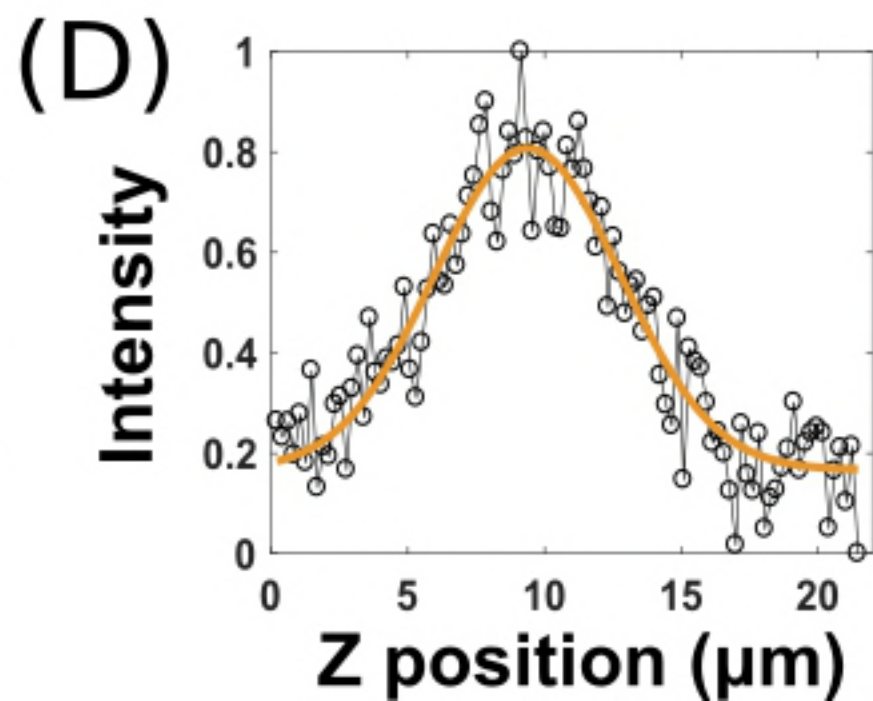

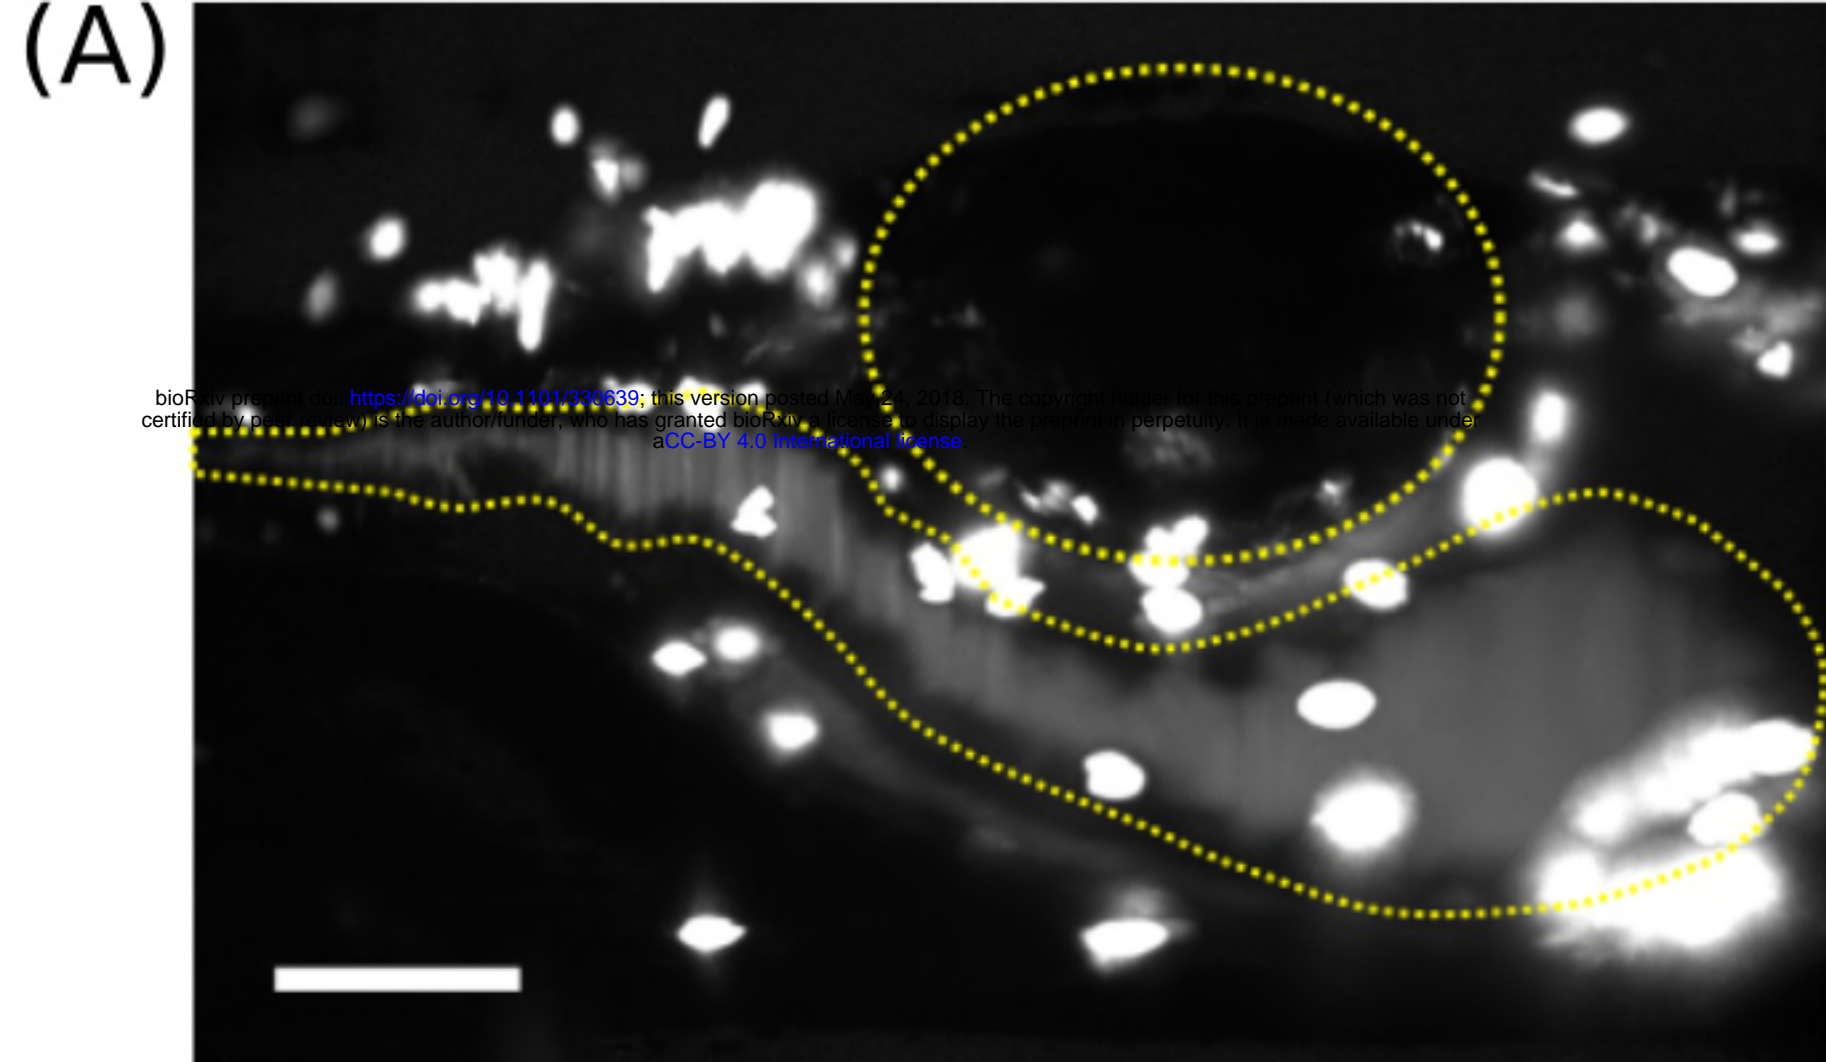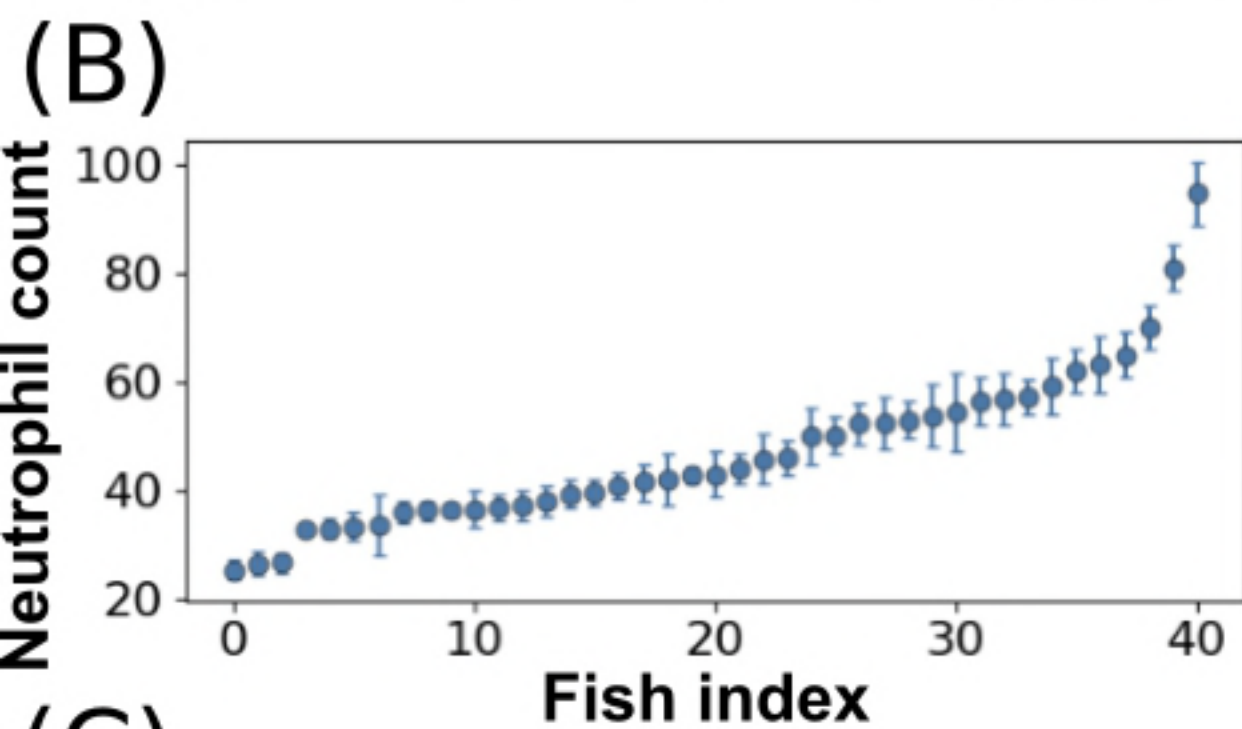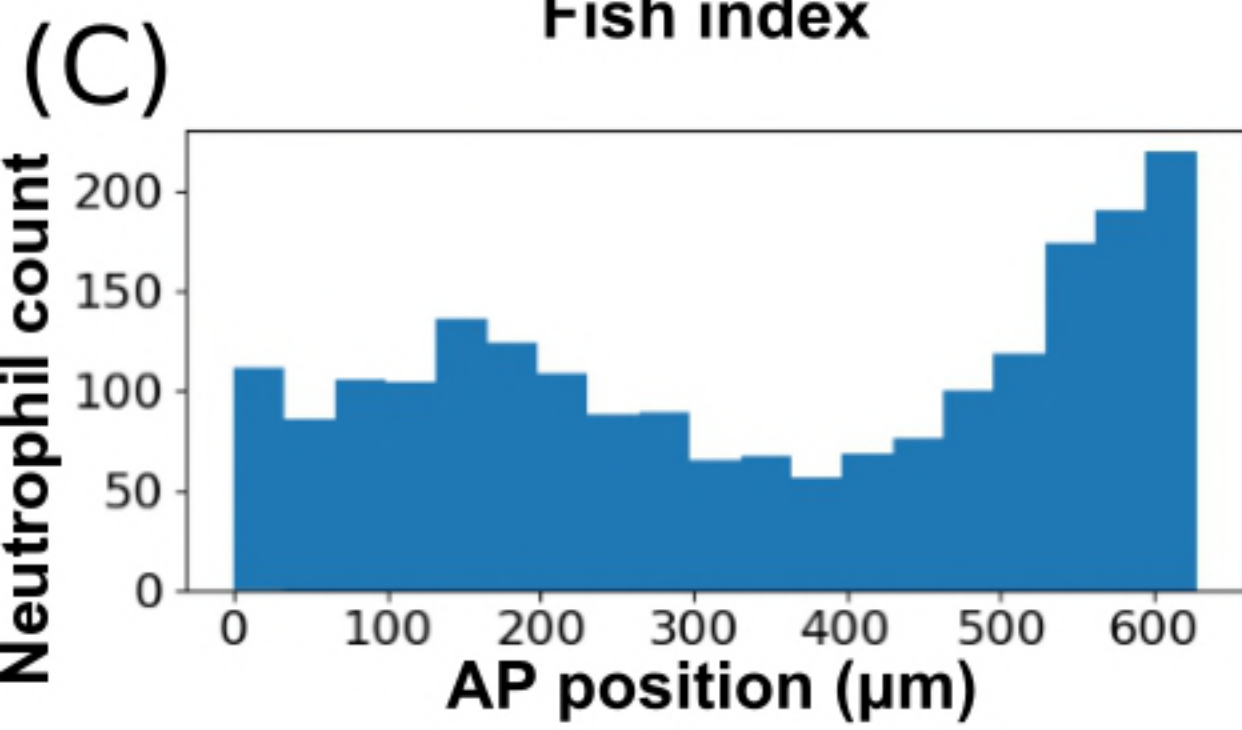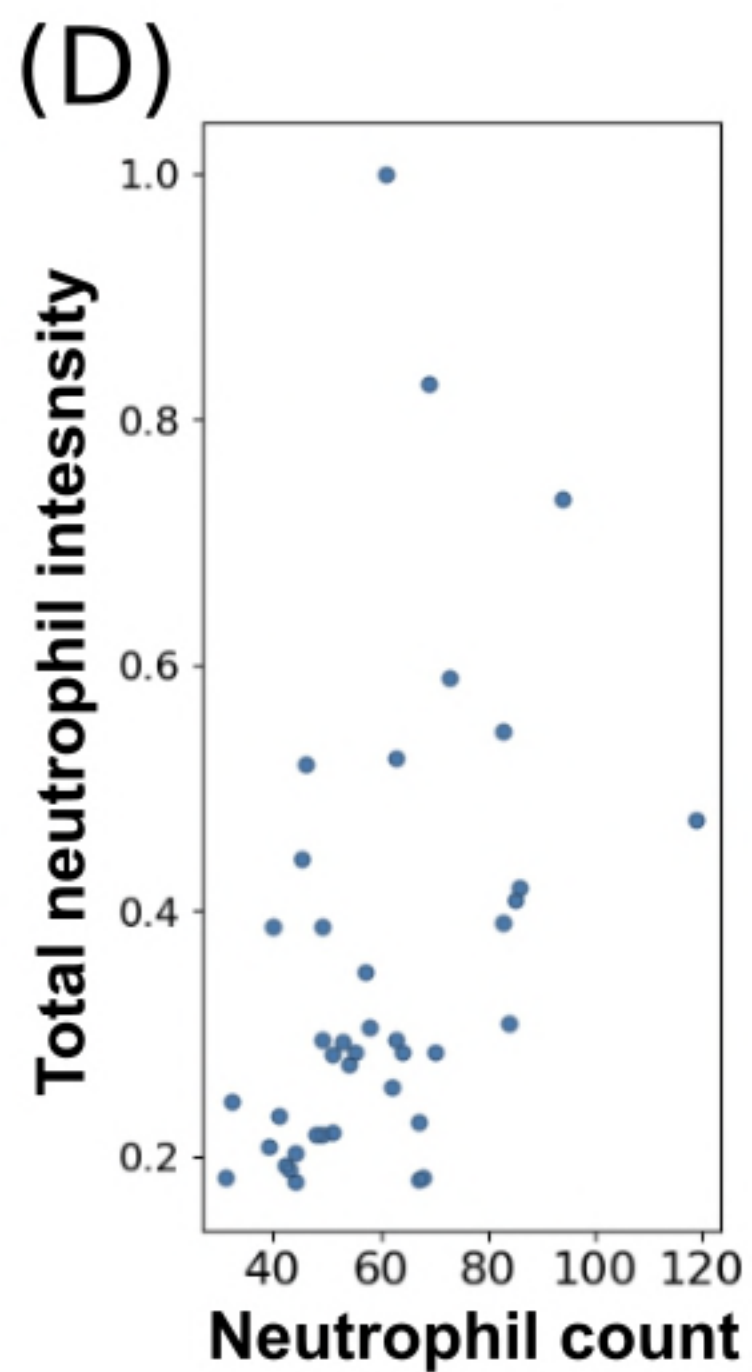

Source: http://biorxiv.org/content/10.1101/330639v1.full.pdf
